# Supplementary material
Source: publisher figshare collection journal article supplement (https://acs.figshare.com/ndownloader/files/24127641)
Supplement: Supplementary file 1 [file 24127641]

## Supporting Information

### Solvent-Controlled Morphology of Amino-Functionalized Bimetal MOFs for Asymmetric Supercapacitors

Jie Sun, Xianbo Yu, Shihang Zhao, Hongmei Chen, Kai Tao and Lei Han\*

State Key Laboratory Base of Novel Functional Materials and Preparation Science, School of Materials Science and Chemical Engineering, Ningbo University, Ningbo, Zhejiang 315211, China.

\*Corresponding email: hanlei@nbu.edu.cn (L Han)

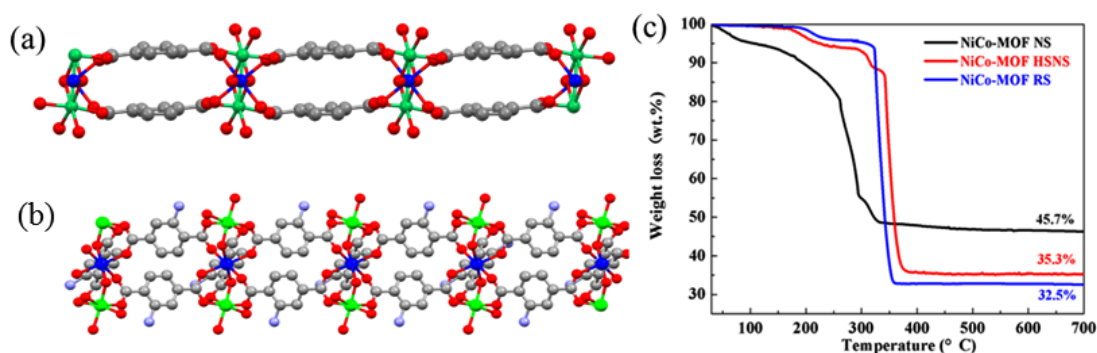

**Figure S1.** (a) The simulated 2D crystal structure of NiCo-MOF NSHS. (b) The simulated 2D crystal structure of NiCo-MOF RS. (c) TGA curves of NiCo-MOF NS, NiCo-MOF NSHS and NiCo-MOF RS.

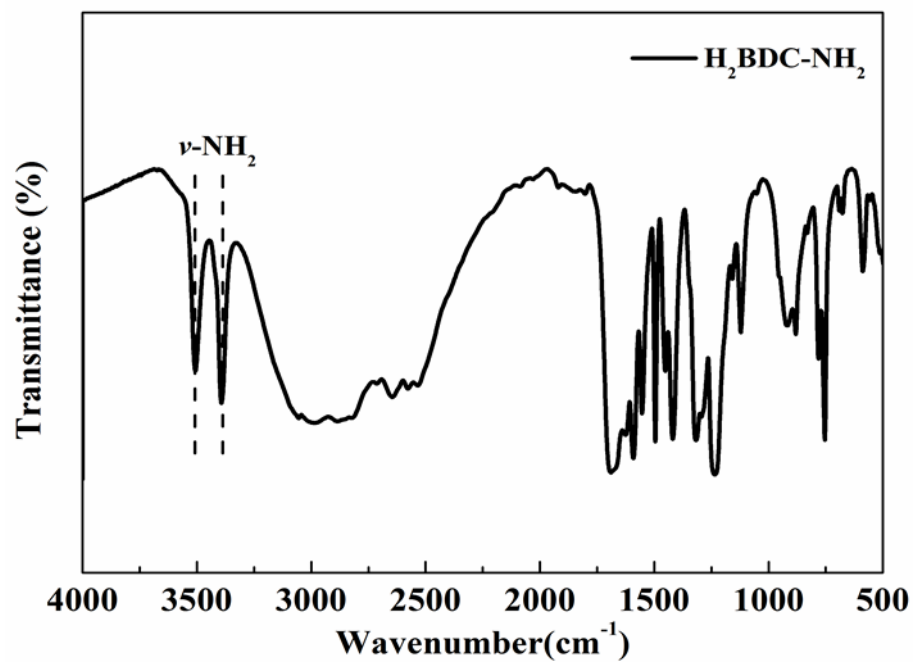

Figure S2. FTIR spectra of  $\text{H}_2\text{BDC-NH}_2$ .

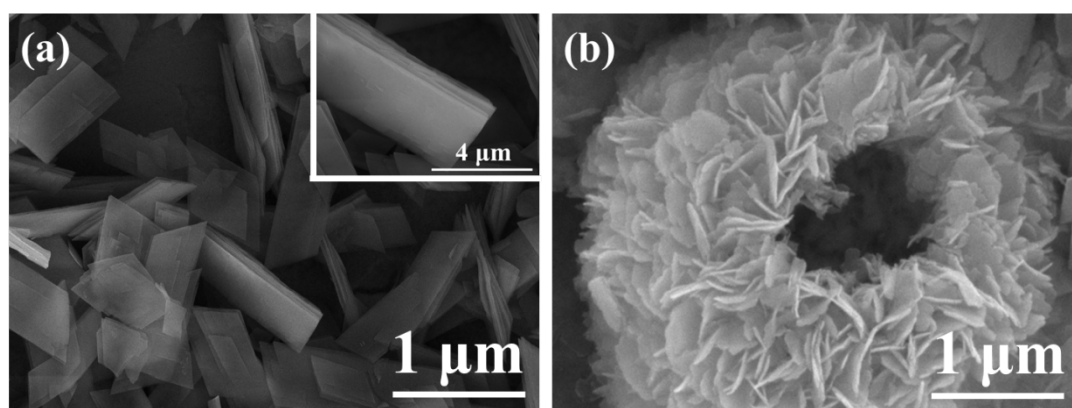

Figure S3. SEM images of (a)  $\text{NiCo-BDC-MOF}$  and (b)  $\text{NiZn-MOF NSHS}$ .

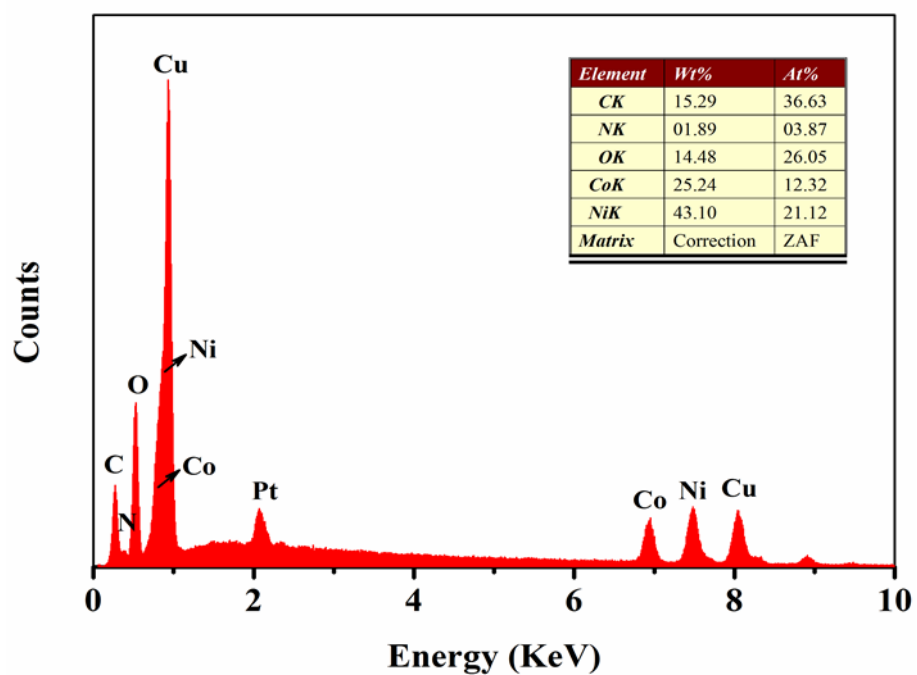

**Figure S4.** Energy dispersive X-ray spectra of NiCo-MOFs.

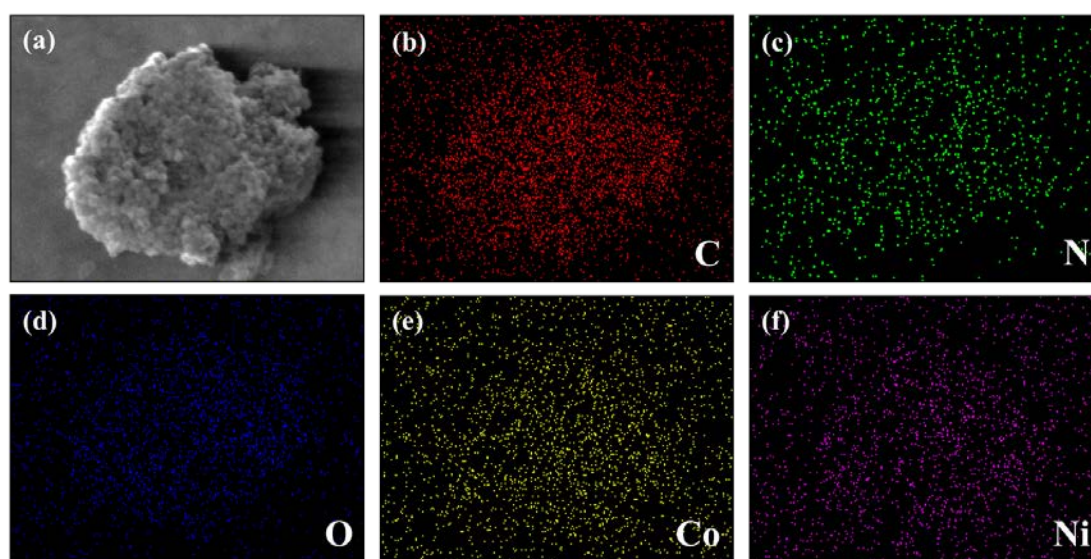

**Figure S5.** Elemental maps of NiCo-MOF NS.

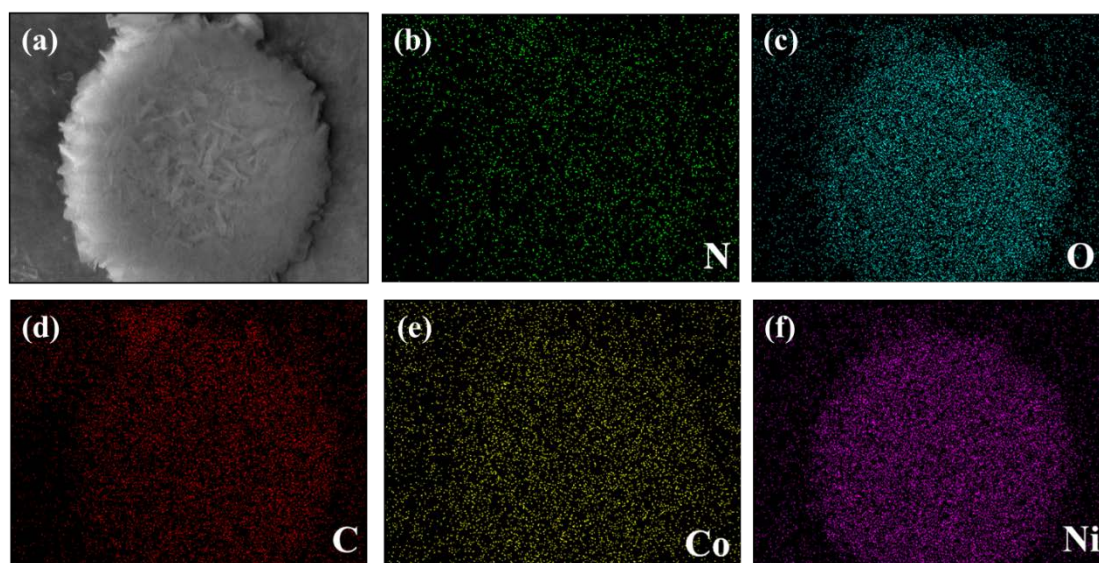

**Figure S6.** Elemental maps of NiCo-MOF NSHS.

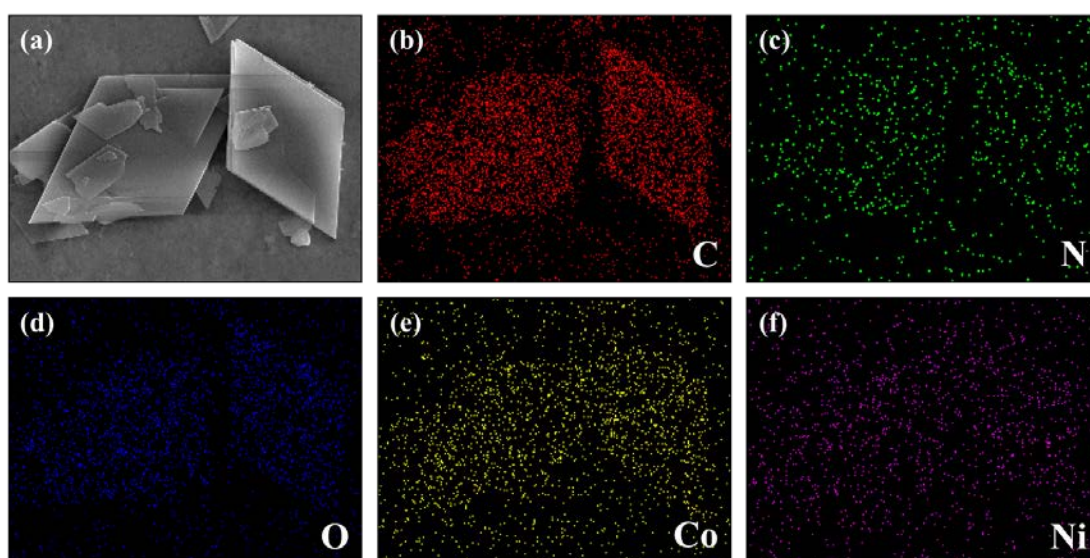

**Figure S7.** Elemental maps of NiCo-MOF RS.



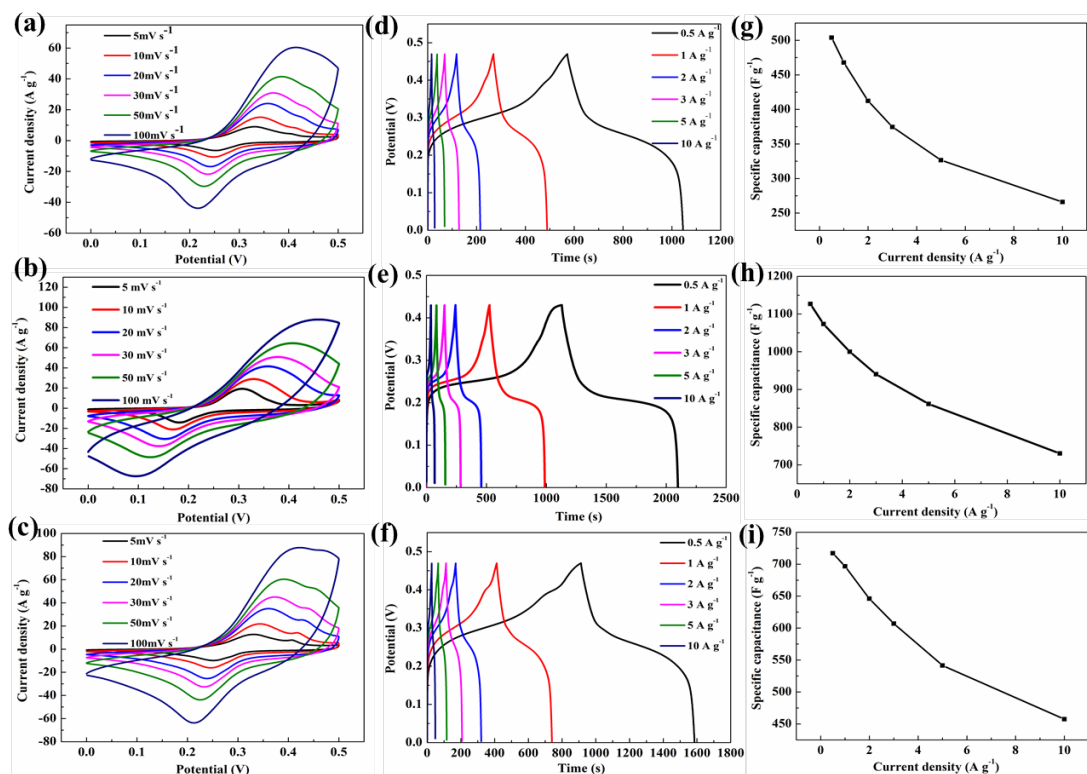

**Figure S8.** (a) CV curves of NiCo-MOF NS; (b) CV curves of NiCo-MOF NSHS; (c) CV curves of NiCo-MOF RS; (d) GCD curves of NiCo-MOF NS; (e) GCD curves of NiCo-MOF NSHS; (f) GCD curves of NiCo-MOF RS; (g) Specific capacitances of NiCo-MOF NS; (h) Specific capacitances of NiCo-MOF NSHS. (i) Specific capacitances of NiCo-MOF RS.

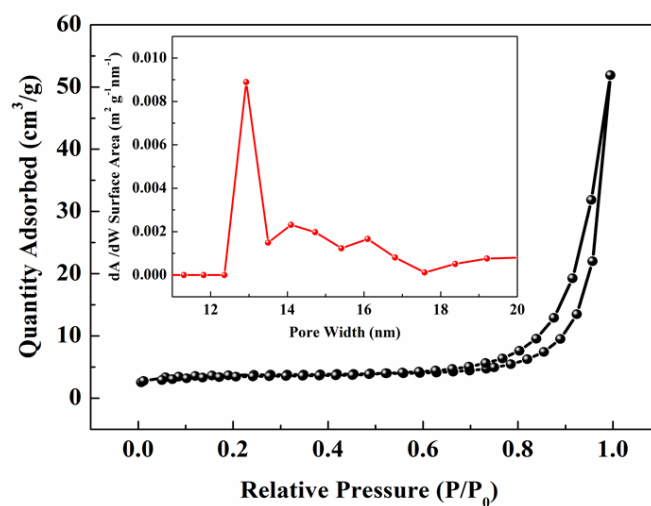

**Figure S9.** N<sub>2</sub> adsorption-desorption isotherms and corresponding pore-size distribution curves of NiCo-MOF NSHS.

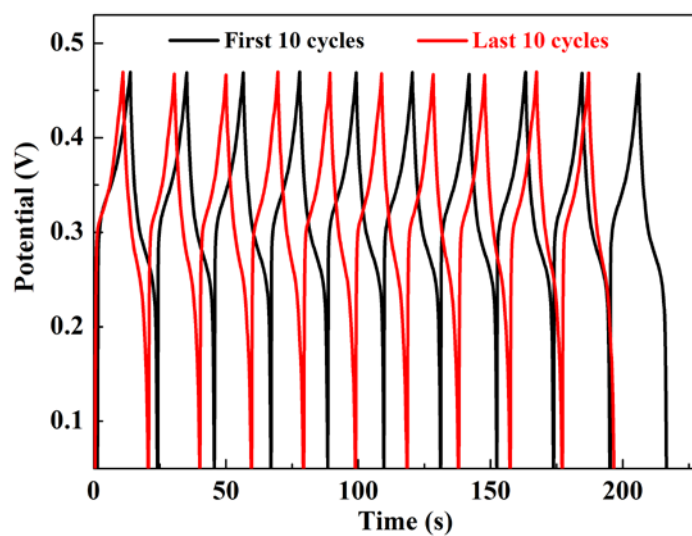

**Figure S10.** Comparison of the first 10 cycles and the last 10 cycles of NiCo-MOF NSHS.

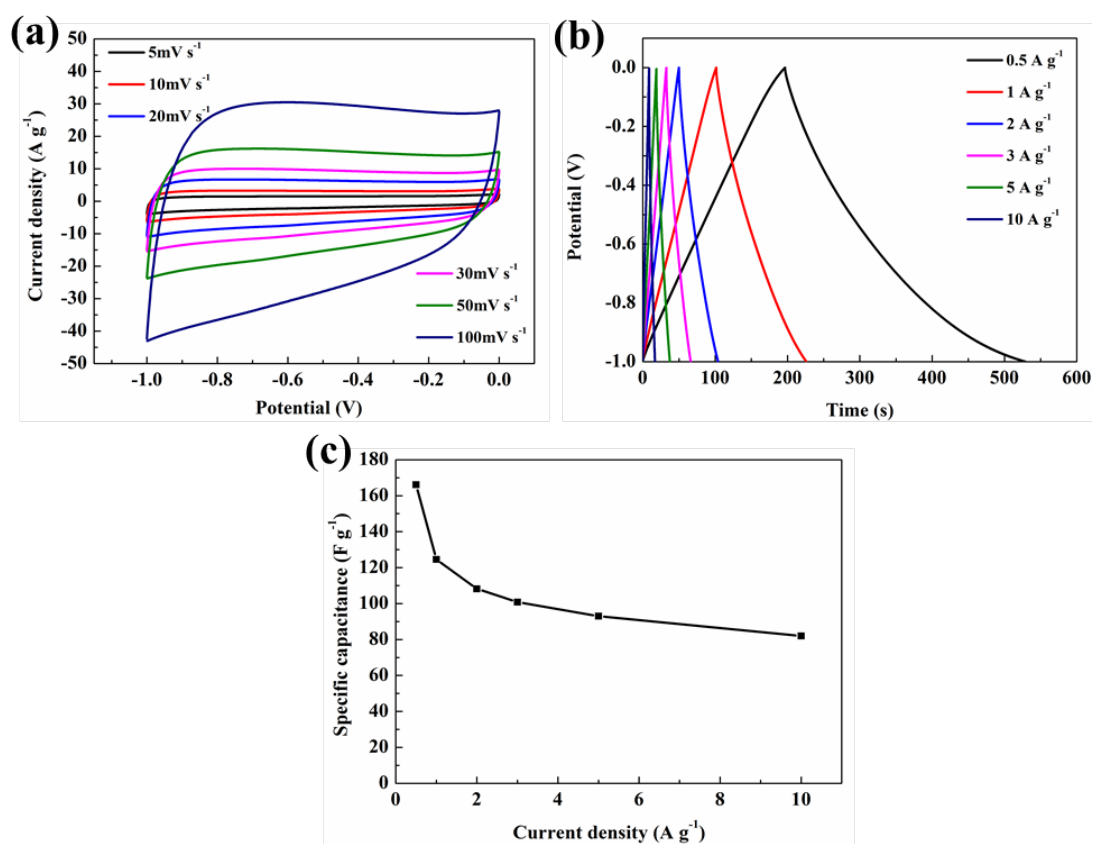

**Figure S11.** (a) CV curves, (b) GCD curves and (c) specific capacitance of AC electrode.

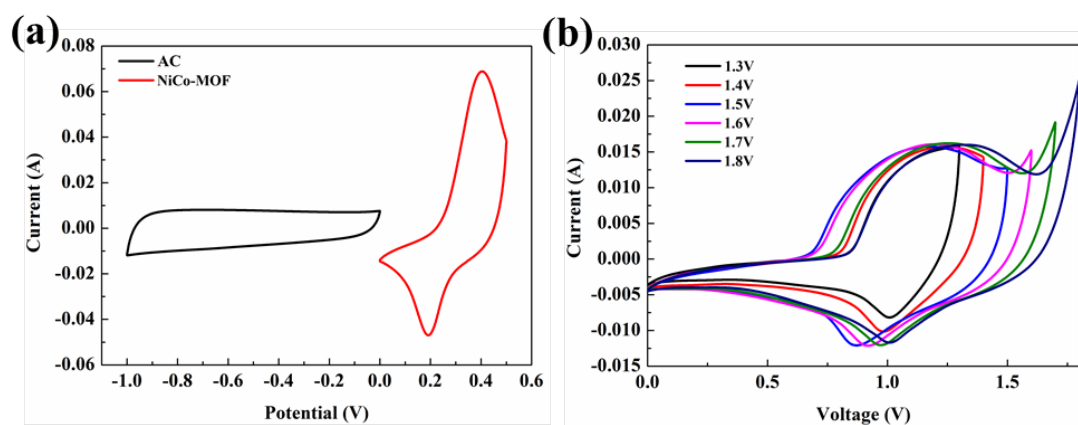

**Figure S12.** (a) CV curves of NiCo-MOF NSHS and AC; (b) NiCo-MOF NSHS //AC ASC device collected in different voltage windows at a scan rate of 50 mV s<sup>-1</sup>.
